# Supplementary material
Source: PubMed Central journal article supplement (PMC3625297)
Supplement: 1219302110_pnas.201219302SI.pdf [file 1219302110_pnas.201219302SI.pdf]

# Supporting Information

Aharoni et al. 10.1073/pnas.1219302110

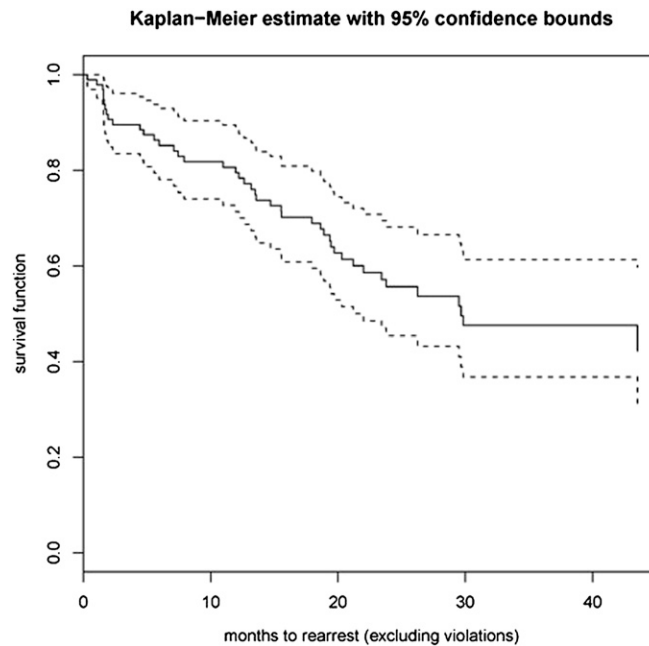

Fig. S1. Kaplan-Meier survival function describing the proportion of participants who avoided rearrest (i.e., “survival”) over time (Mean, 28.97; SE, 2.00).

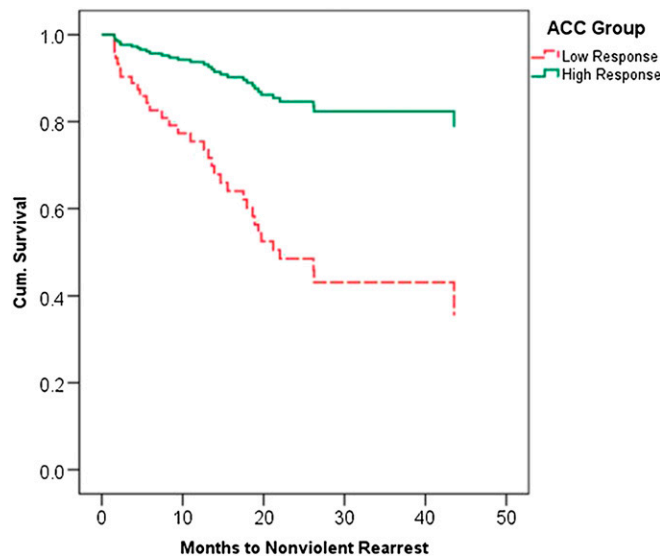

Fig. S2. Cox survival function showing proportional rearrest survival rates of high (solid green) vs. low (dashed red) anterior cingulate cortex (ACC) response participants for nonviolent crimes. Results of the median split analysis were equivalent to that of the parametric model: bootstrapped  $B = 1.47$ ;  $SE = 0.51$ ; 95% confidence interval (CI), 0.70–2.69;  $P < 0.001$ . The probability that offenders with relatively high ACC activity would be rearrested for a nonviolent crime within this time window was 31%, as opposed to 52% for low ACC offenders. Mean survival times to rearrest for a nonviolent crime for the high and low ACC activity groups were 37.59 (2.01) mo and 28.43 (2.90) mo, respectively.

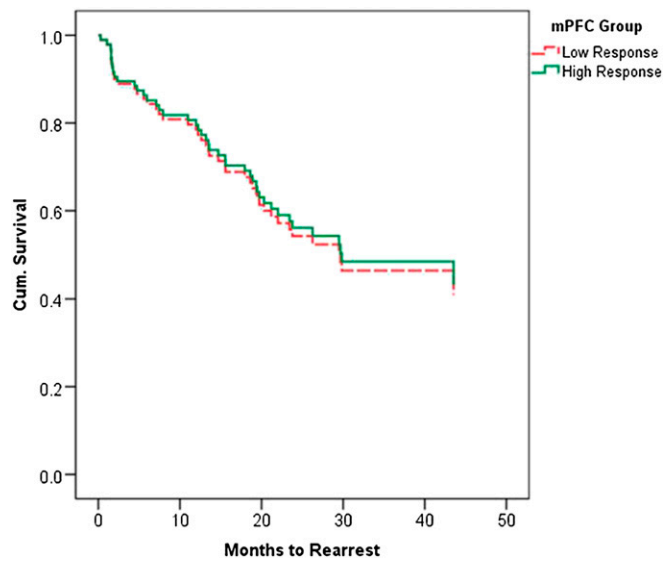

**Fig. S3.** Cox survival function showing nonsignificant difference in proportion of rearrests for high (solid green) vs. low (dashed red) medial prefrontal cortex (mPFC) control region response groups for any crime, controlling for other measured covariates. Results of the median split analysis were equivalent to that of the parametric model: bootstrapped  $B = 0.08$ ;  $SE = 0.40$ ; 95% CI,  $-0.69$  to  $0.88$ ;  $P = 0.82$ . Mean survival time to rearrest for the high and low medial prefrontal cortex groups were 29.00 (2.68) mo and 28.27 (2.85) mo, respectively.

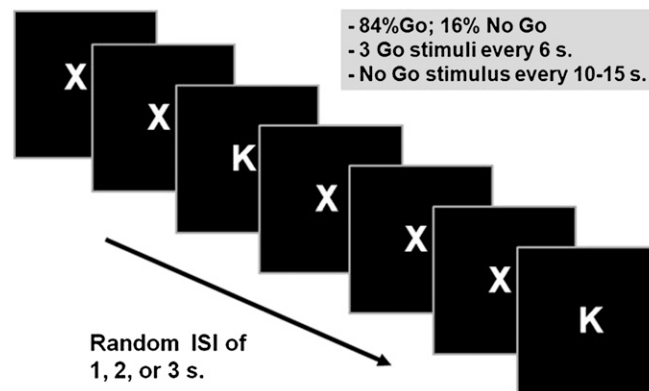

**Fig. S4.** Go/No-Go task. The letter “X” is the target (i.e., “go”) stimulus. The letter “K” is the distractor (i.e., “no-go”) stimulus. Commission errors occur when the participant erroneously presses the button for a distractor stimulus.

**Table S1. Results of individual Cox regression analyses for seven risk factors for rearrest, showing change in  $\chi^2$  ( $\Delta\chi^2$ ), unstandardized  $B$ , and relative risk statistic ( $\exp[B]$ )**

| Factor                              | N  | Mean   | SD    | $\Delta\chi^2$ ( $P$ value) | $B$   | $\exp[B]$ | 95% CI for $\exp[B]$ |
|-------------------------------------|----|--------|-------|-----------------------------|-------|-----------|----------------------|
| Months to rearrest                  | 96 | 21.97  | 13.81 | —                           | —     | —         | —                    |
| Age at release                      | 96 | 33.10  | 7.78  | 3.42 (0.07)                 | -0.04 | 0.97      | 0.93–1.00            |
| PCL-R factor 1 score                | 90 | 7.46   | 3.34  | 0.35 (0.56)                 | 0.03  | 1.03      | 0.94–1.12            |
| PCL-R factor 2 score                | 90 | 13.95  | 3.78  | 4.43 (0.04)                 | -1.49 | 0.23      | 0.06–0.89            |
| PCL-R factor interaction            | 90 | 110.90 | 65.17 | 0.00 (0.98)                 | 0.01  | 1.01      | 0.67–1.52            |
| Drug abuse/dependence (lifetime)    | 92 | 1.78   | 0.42  | 0.10 (0.75)                 | -0.11 | 0.90      | 0.45–1.78            |
| Alcohol abuse/dependence (lifetime) | 92 | 2.37   | 0.81  | 0.11 (0.74)                 | -0.06 | 0.94      | 0.66–1.34            |
| GNG commission error rate           | 96 | 25.04  | 13.00 | 0.53 (0.47)                 | 0.08  | 1.08      | 0.88–1.32            |

All  $df = 1$ . PCL-R factor 2 and GNG commission error distributions were skewed but successfully normalized using a log10 and square root transformation, respectively. GNG, go/no-go; PCL-R, Psychopathy Checklist-Revised.

**Table S2. Pearson correlations between nine potential risk factors**

| Factor                                  | mPFC<br>β-values | Age at<br>release | PCL-R             |                   |                       | Alcohol abuse/<br>dependence (lifetime) | Drug abuse/<br>dependence (lifetime) | GNG commission<br>error rate |
|-----------------------------------------|------------------|-------------------|-------------------|-------------------|-----------------------|-----------------------------------------|--------------------------------------|------------------------------|
|                                         |                  |                   | Factor 1<br>score | Factor 2<br>score | Factor<br>interaction |                                         |                                      |                              |
| ACC β-values                            | 0.00             | -0.22*            | 0.15              | 0.05              | 0.10                  | 0.10                                    | -0.22*                               | -0.17                        |
| mPFC β-values                           | —                | -0.07             | -0.11             | 0.02              | -0.22*                | 0.08                                    | 0.08                                 | 0.06                         |
| Age at release                          | —                | —                 | -0.03             | -0.13             | -0.11                 | 0.05                                    | 0.08                                 | -0.18                        |
| PCL-R factor 1 score                    | —                | —                 | —                 | 0.55**            | -0.16                 | -0.07                                   | 0.00                                 | 0.08                         |
| PCL-R factor 2 score                    | —                | —                 | —                 | —                 | 0.09                  | -0.02                                   | -0.18                                | -0.15                        |
| PCL-R factor interaction                | —                | —                 | —                 | —                 | —                     | -0.02                                   | 0.16                                 | -0.07                        |
| Alcohol abuse/<br>dependence (lifetime) | —                | —                 | —                 | —                 | —                     | —                                       | 0.25*                                | -0.04                        |
| Drug abuse/ dependence<br>(lifetime)    | —                | —                 | —                 | —                 | —                     | —                                       | —                                    | 0.02                         |

GNG, go/no-go; PCL-R, Psychopathy Checklist-Revised. \* $P < 0.05$ , \*\* $P < 0.01$ .

**Table S3. Peak activations for commission errors vs. correct hits in offender sample**

| Region                 | Lobe       | t value | x   | y   | z   | BA | Volume, voxels |
|------------------------|------------|---------|-----|-----|-----|----|----------------|
| Anterior cingulate     | Limbic     | 14.49   | 3   | 24  | 33  | 32 | 1,808          |
| Inferior frontal gyrus | Frontal    | 14.04   | 36  | 15  | -15 | 47 | 4,543          |
| Insula                 | Limbic     | 13.86   | -36 | 12  | -6  | 13 | 1,948          |
| Fusiform gyrus         | Temporal   | 7.88    | 0   | -54 | 57  | 37 | 121            |
| Culmen                 | Cerebellum | 7.24    | -39 | -48 | -18 | —  | 20             |

$n = 96$ ,  $P < 0.00001$  family-wise error.

**Table S4. Crime coding scheme**

| Code | Crime classification                            |
|------|-------------------------------------------------|
| 1    | Arson: minor (NV)                               |
| 2    | Arson: major                                    |
| 3    | Arson: unspecified                              |
| 4    | Assault (V)                                     |
| 5    | Battery (V)                                     |
| 6    | Burglary/breaking and entering (NV)             |
| 7    | Causing a disturbance (NV)                      |
| 8    | Crime against the state (V)                     |
| 9    | Driving offense: major (NV)                     |
| 10   | Driving offense: minor (NV)                     |
| 11   | Driving offense: unspecified                    |
| 12   | Drug offense (NV)                               |
| 13   | Forgery (NV)                                    |
| 14   | Fraud/embezzlement (NV)                         |
| 15   | Homicide/attempted murder (V)                   |
| 16   | Kidnapping (V)                                  |
| 17   | Larceny/theft (NV)                              |
| 18   | Obstruction of justice (NV)                     |
| 19   | Robbery (V)                                     |
| 20   | Sex offense: major (V)                          |
| 21   | Sex offense: minor (V)                          |
| 22   | Sex offense: unspecified                        |
| 23   | Unknown/miscellaneous                           |
| 24   | Uttering threats/potential to harm (NV)         |
| 25   | Violation: escape, parole, probation, technical |
| 26   | Weapons (NV)                                    |
| 27   | Youth status offense                            |

NV, nonviolent; V, violent. Ambiguous classifications remained unspecified.

## Other Supporting Information Files

[Dataset S1 \(XLSX\)](#)
